# Supplementary material
Source: publisher figshare collection journal article supplement (https://gsajournals.figshare.com/ndownloader/files/27623435)
Supplement: Supplementary file 1 [file 27623435]

## Sheet: Sheet1
BANDYOPADHAY, DOUGLASS ET AL.
TABLE S1. Oligonucleotides, sgRNA templates and primers used in this study.
Oligo Name	Sequence	Purpose
DNA Templates for cloning of sgRNAs into a plasmid with the human U6 promoter
HsU6mrg_sgR_Emx1_20a	GTGGAAAGGACGAAACACgacatcgatgtcctccccatGTTTTAGAGCTAGAAATAGCAA	sgRNA template, targeting human Emx1 gene
HsU6mrg_sgR_Emx1_21a	GTGGAAAGGACGAAACACgtcacctccaatgactagggGTTTTAGAGCTAGAAATAGCAA	sgRNA template, targeting human Emx1 gene
HsU6mrg_sgR_Emx1_22a	GTGGAAAGGACGAAACACgggcaaccacaaacccacgaGTTTTAGAGCTAGAAATAGCAA	sgRNA template, targeting human Emx1 gene
sgR_BottStrand_Const	AAAAGCACCGACTCGGTGCCACTTTTTCAAGTTGATAACGGACTAGCCTTATTTTAACTTGCTATTTCTAGCTCTAAAA	Bottom strand template for sgRNA transcription
HsU6_sgRFE_Emx1_20b	GTGGAAAGGACGAAACACgacatcgatgtcctccccatGtttaagagctatgctggaaac	new sgRNA template with FE modification, targeting human Emx1 gene
HsU6_sgRFE_Emx1_21b	GTGGAAAGGACGAAACACgtcacctccaatgactagggGtttaagagctatgctggaaac	new sgRNA template with FE modification, targeting human Emx1 gene
HsU6_sgRFE_Emx1_22b	GTGGAAAGGACGAAACACgggcaaccacaaacccacgaGtttaagagctatgctggaaac	new sgRNA template with FE modification, targeting human Emx1 gene
sgR_BottomStrand_FE	AAAAGCACCGACTCGGTGCCACTTTTTCAAGTTGATAACGGACTAGCCTTATTTTAACTTGCTATGCTGTTTCCAGCATAGCTCTTAAAC	new Constant bottom strand for sgRNA production with FE modification
Oligos for cloning long 1.0kb and 0.7kb EMX1 homology arms around PGK-Puro cassette
Emx1_LeftArm_reg	/5Phos/GGCCTGCTTCGTGGCAATGCGCCACCGGTTGATGTGATGGGAGCCCTTCTTCTTCTGCTCGGACTCAGGCCCTTCCTCCTCCAGCTTCTG	Oligo to construct Emx1 Left Arm targeting construct
HindIII_TopStrandMerg	ACGAAGCAGGCCAATGGGGAGGACATCGATGTCACCTCCAATGACAAGCTTGCTAGCGGTGGGCAACCA	Oligo to construct Emx1 Left Arm targeting construct
Emx1_RightArm_reg	AGGGAGTGGCCAGAGTCCAGCTTGGGCCCACGCAGGGGCCTGGCCAGCAGCAAGCAGCACTCTGCCCTCGTGGGTTTGTGGTTGCCCACC	Oligo to construct Emx1 Right Arm targeting construct
HindIII_midjoin_reg	/5Phos/gctagcaagcttGTCATTGGAGGTGACATCGATGTCCTCCCCATT	Oligo to construct Emx1 Right Arm targeting construct
Oligos for coupling to Benzylguanine or Fluorescein
RNT1 (Bot_RR_IN1_dT)	/5Phos/TGAGGCTACAATCTGCTGAGGTCATCTGAGC/iAmMC6T/GAGGACAATTGACGCTGAGGTCGTGGCAAGC	Long oligo has an internal primary amine to couple to BG-NHS or FL-NHS, to label pCNEPm3 plasmids
RNT2 (Bot_RR_IN2_dT)	/5Phos/TGAGGCTACAATCTGCTGAGG/iAmMC6T/CATCTGAGCTGAGGACAATTGACGC/iAmMC6T/GAGGTCGTGGCAAGC	Long oligo has TWO internal primary amines to couple to BG-NHS or FL-NHS, to label pCNEPm3 plasmids
Oligos for cloning of 100bp homology arms to generate L3SSO constructs
pChep1Fw1	cgcgactagtgaattctgtggttccagaaccggaggacaaagtacaaacggcagaagctggaggaggaagggcctgagtccgagcagaag	Generates 100bp Left homology arm flanked by Nt.BbvCI nicking sites
pChep1Rv1	CCTACCCGGTAGAATTGCTGAGGCCGGGCTGAGGCAATGCGCCACCGGTTGATGTGATGGGAGCCCTTCTTCTTCTGCTCGGACTCAGGC	Generates 100bp Left homology arm flanked by Nt.BbvCI nicking sites
pChep1Fw2	aattctaccgggtaggggaggcgctt	Amplifies PGK promoter and Puro resistance marker
pChep1Rv2	CCCCCTTTTTCTGGAGACTAAATAAAATCTTTTATTTTCAGGCACCGGGCTTGCGGGTCA	Amplifies PGK promoter and Puro resistance marker
pChep1Fw3	ctccagaaaaaggggggctgaggccgggctgaggaggcccctgcgtgggcccaagctggactctggccactccctggccaggctttgggg	Generates 100bp Right homology arm flanked by Nt.BbvCI nicking sites
pChep1Rv3	ATGGGTCGACGAGCTCCTCTGTCAATGGCGGCCCCGGGCTTCAAGCCCTGTGGGGCCATGACTCCAGGCCTCCCCAAAGCCTGGCCAGGG	Generates 100bp Right homology arm flanked by Nt.BbvCI nicking sites
EmxI DNA Templates for In vitro transcription of sgRNAs with NEB EnGen® sgRNA synthesis kit
EnGen_sgR20 (EmxI)	TTCTAATACGACTCACTATAgacatcgatgtcctccccatGTTTTAGAGCTAGA	target:GACATCGATGTCCTCCCCAT
EnGen_sgR21 (EmxI)	TTCTAATACGACTCACTATAgtcacctccaatgactagggGTTTTAGAGCTAGA	target: gtcacctccaatgactagggt
EnGen_sgR22 (EmxI)	TTCTAATACGACTCACTATAgggcaaccacaaacccacgaGTTTTAGAGCTAGA	target: atggggaggacatcgatgtc
EGsR_Rsad2_sgRNA1	TTCTAATACGACTCACTATAgaggtgtaagcacccacattgGTTTTAGAGCTAGA	target:AGGTGTAAGCACCCACATTG
EGsR_Rsad2_sgRNA2	TTCTAATACGACTCACTATAgttacacctgctgcttttgctGTTTTAGAGCTAGA	target:TTACACCTGCTGCTTTTGCT
EGsR_ISG15_1	TTCTAATACGACTCACTATAGgctggcgggcaacgaattccGTTTTAGAGCTAGA	target: gctggcgggcaacgaattcc
EGsR_ISG15_2	TTCTAATACGACTCACTATAGctgacggtgaagatgctggcGTTTTAGAGCTAGA	target: ctgacggtgaagatgctggc
EGsR_ISG15_3	TTCTAATACGACTCACTATAGcaccgacatggagctgctcaGTTTTAGAGCTAGA	target: caccgacatggagctgctca
EGsR_ISG56_1	TTCTAATACGACTCACTATAGtgatttagaaaacagagtctGTTTTAGAGCTAGA	target: tgatttagaaaacagagtct
EGsR_ISG56_2	TTCTAATACGACTCACTATAGaagactctgttttctaaatcGTTTTAGAGCTAGA	target: aagactctgttttctaaatc
EGsR_ISG56_3	TTCTAATACGACTCACTATAGaggcatttcatcgtcatcaaGTTTTAGAGCTAGA	target: aggcatttcatcgtcatcaa
EGsR_ACE2_a	TTCTAATACGACTCACTATAGgatgtgatcttggctcacagGTTTTAGAGCTAGA	target: gatgtgatcttggctcacag
EGsR_ACE2_b	TTCTAATACGACTCACTATAGtcattcagtggatgtgatctGTTTTAGAGCTAGA	target: tcattcagtggatgtgatct
EGsR_AeAeg_Piwi5_a	TTCTAATACGACTCACTATAGaaactatgttttagaacgggGTTTTAGAGCTAGA	target: aaactatgttttagaacggg
EGsR_AeAeg_Piwi5_b	TTCTAATACGACTCACTATAGagaacgggcggatttaaataGTTTTAGAGCTAGA	target: agaacgggcggatttaaata
EGsR_AeAeg_Piwi5_c	TTCTAATACGACTCACTATAGatgaaactatgttttagaacGTTTTAGAGCTAGA	target: atgaaactatgttttagaac
EGsR_AeAeg_Ago3_a	TTCTAATACGACTCACTATAGaggagtttctaaacgtacgaGTTTTAGAGCTAGA	target: aggagtttctaaacgtacga
EGsR_AeAeg_Ago3_b	TTCTAATACGACTCACTATAGcgtacgtttagaaactcctaGTTTTAGAGCTAGA	target:cgtacgtttagaaactccta
EGsR_AeAeg_Ago3_c	TTCTAATACGACTCACTATAGacgacggaaaaatgtcctcgGTTTTAGAGCTAGA	target:acgacggaaaaatgtcctcg
EGsgR_hsAgo2_ex_b	TTCTAATACGACTCACTATAGgcctccacctagacccgacttGTTTTAGAGCTAGA	target:gcctccacctagacccgactt
Oligos for qPCR analysis of integration of Sense and Antisense marker transgene cassette/ directionality of selection marker
Emx1_qPCR_Fw1	TCTACCCCTGGGTCCTGCGGAAC	qPCR analysis of Emx1 mRNA expression, pairs with exon 1, span big intron
Emx1_qPCR_Rv1	TGCGTCTCGGAGAGGCTGAGACT	qPCR analysis of Emx1 mRNA expression, pairs with exon 2, span big intron
Emx1_qPCR_Fw2	GAGCGCGCCTTCGAGAAGAAC	qPCR analysis of Emx1 mRNA expression, pairs with exon 2, spans intron between exons2 and 3
Emx1_qPCR_Rv2	CCACCGGTTGATGTGATGGGAG	qPCR analysis of Emx1 mRNA expression, pairs with exon 3, spans intron between exons2 and 3
Emx1_qPCR_Fw3	CGCCTTCGAGAAGAACCACT	qPCR analysis of Emx1 mRNA expression, pairs with exon 2, spans intron between exons2 and 3
Emx1_qPCR_Rv3	GCCCACCCTAGTCATTGGAG	qPCR analysis of Emx1 mRNA expression, pairs with exon 3, spans intron between exons2 and 3
Oligos to investigate the integration of PGK-Puro-HDR-backbone of pCNEPm3 into Emx1 locus
PGT_Fw1	CCCAACTTAATCGCCTTGCAG	to understand PGK-Puro HDR integration outcome
PGT_Fw2	GACTGGGCACAACAGACAATCG	to understand PGK-Puro HDR integration outcome
PGT_Fw3	CTTCTATCGCCTTCTTGACGAG	to understand PGK-Puro HDR integration outcome
PGT_Fw4	GCTTGGAGCGAACGACCTACAC	to understand PGK-Puro HDR integration outcome
PGT_Fw5	GATCAAAGGATCTTCTTGAGATC	3 new F and R primers to confirm integration of PGK-Puro-HDR-backbone of pCNEPm3 into Emx1 locus
PGT_Fw6	CCTGTTACCAGTGGCTGCTGC	3 new F and R primers to confirm integration of PGK-Puro-HDR-backbone of pCNEPm3 into Emx1 locus
PGT_Fw7	CCACCTCTGACTTGAGCGTCG	3 new F and R primers to confirm integration of PGK-Puro-HDR-backbone of pCNEPm3 into Emx1 locus
PGT_Rv1	GCTGAGATCAGCCACTTCTTC	to understand PGK-Puro HDR integration outcome
PGT_Rv2	GATGGAAGCCGGTCTTGTCGATC	to understand PGK-Puro HDR integration outcome
PGT_Rv3	GTGGCCTAACTACGGCTACAC	to understand PGK-Puro HDR integration outcome
PGT_Rv4	CTCACTGACTCGCTGCGCTCG	to understand PGK-Puro HDR integration outcome
PGT_Rv5	GTGGCGCTTTCTCATAGCTCAC	3 new F and R primers to confirm integration of PGK-Puro-HDR-backbone of pCNEPm3 into Emx1 locus
PGT_Rv6	GGTAACTATCGTCTTGAGTCCAAC	3 new F and R primers to confirm integration of PGK-Puro-HDR-backbone of pCNEPm3 into Emx1 locus
PGT_Rv7	GAAACCTGTCGTGCCAGCTGC	3 new F and R primers to confirm integration of PGK-Puro-HDR-backbone of pCNEPm3 into Emx1 locus
Oligos for genomic PCR analysis of Cas9-HDR stimulated integrants at EMX1 locus
EmxI_RFLP_Fw2	GTTCAAAGTAGAGCTCACTTCTGTC-	Check transgene integration at EmxI locus - homology arm 1, Amplicon A
PGK_screen_Rv	ACTTGTGTAGCGCCAAGTGC	Check transgene integration at EmxI locus - homology arm 1, Amplicon A
EmxI_RFLP_Rv2	GTCTGGATGTCGTAAGGGAAAGAC	Check transgene integration at EmxI locus - homology arm 2, Amplicon B
Puro_screen_Fw2	CACCTGGTGCATGACCCGCAAG	Check transgene integration at EmxI locus - homology arm 2, Amplicon B (better than Puro_screen_Fw1)
Emx1-FW5	CCTGACTCTGCAAAGCCAAGTAAAG	Amplifies a 2.9kb amplicon D from Emx1 locus
Emx1-RV5	TGGATGTGATCCCCACAAGGCAAAG	Amplifies a 2.9kb amplicon D from Emx1 locus
Emx1-FW6	AAAACCAAGAGGCTACCCACCATTC	Amplifies a 3.5kb amplicon E from Emx1 locus
Emx1-RV6	GTGCTGCATTAGGGAGGTGTGGTTG	Amplifies a 3.5kb amplicon E from Emx1 locus
Emx1_PoisonFw1	gggcaaccacaaacccacgag	Pairs to unedited EMX1 locus that lacks repair L3SSO repair template
Emx_NestFw1	catgggagcagctggtcagagg	Primary PCR rounds for Amplicon C for use with L3SSO repair template and Poison primer
Emx_NestRv1	ATTGGAGACACGGAGAGCAGCTG	Primary PCR rounds for Amplicon C for use with L3SSO repair template and Poison primer
Emx_NestFw2	taaccctatgtagcctcagtc	Secondary PCR rounds for Amplicon C for use with L3SSO repair template, after Primary PCR
Emx_NestRv2	CAGGCAGGCAGGCTCTCCGAG	Secondary PCR rounds for Amplicon C for use with L3SSO repair template, after Primary PCR
EmxI_Surv_Fw4	AAACCACCCTTCTCTCTGGC	Additional primers to amplify Amplicon C in primary PCR rounds with poison primers to assess HDR with EmxI-PGK Puro L3SSO repair template
EmxI_Surv_Rv3	GCCCGTGTCATTAAGAGAGAGAC	Additional primers to amplify Amplicon C in primary PCR rounds with poison primers to assess HDR with EmxI-PGK Puro L3SSO repair template
Oligos for making the Biotinylated PGK-PuroR template for adding Homology Arms to antibiotic selection marker cassette in homo sapiens hs EmxI
PGK_Fw_Biotin	/5Biosg/aattctaccgggtaggggaggcgcttttcc	Fw primer to amplify and add biotin to pGK-PuroR Blasso base
Puro_Rv_Bio	/5Biosg/CCCCCTTTTTCTGGAGACTAAATAAAATCT	Rv primer to amplify and add biotin to pGK-PuroR Blasso base
Oligos for adding Homology Arms to PGK-Puro for EmxI-BL3SSO construct
Emx1_HDR-L_Fw2	aaccggaggacaaagtacaaacggcagaagctggaggagg	Outer F primer to add Left arm of hsEmx1 HDR template
Emx1_HDR-L_Fw1	acggcagaagctggaggaggaagggcctgagtccgagcagaagaagaagggctcccatcacatcaaccggtggcgcattgaattctaccgggtaggggag	Inner F primer to add Left arm of hsEmx1 HDR template
Emx1_HDR_R_Rv1	CTGTGGGGCCATGACTCCAGGCCTCCCCAAAGCCTGGCCAGGGAGTGGCCAGAGTCCAGCTTGGGCCCACGCAGGGGCCTCCCCCTTTTTCTGGAGACTA	Outer R primer to add Right arm of hsEmx1 HDR template
Emx1_HDR_R_Rv2	GCGGCCCCGGGCTTCAAGCCCTGTGGGGCCATGACTCCAG	Inner R primer to add Right arm of hsEmx1 HDR template
Emx1_HDR-L_Fw5	AACCGGAGGACAAAGTACAAACGGCAGAAGCTGGAGGAGGAAGGGCCTGAGTCCGAGCAG	Additional Outer F primer to add Left arm of hsEmx1 HDR template
Emx1_HDR_L_Fw4	GTCCGAGCAGAAGAAGAAGGGCTCCCATCACATCAACCGGTGGCGCATTGAATTCTACCG	Additional Inner F primer to add Left arm of hsEmx1 HDR template
Emx1_HDR_R_Rv4	AGCCTGGCCAGGGAGTGGCCAGAGTCCAGCTTGGGCCCACGCAGGGGCCTCCCCCTTTTT	Additional Outer R primer to add Right arm of hsEmx1 HDR template
Emx1_HDR_R_Rv5	GCGGCCCCGGGCTTCAAGCCCTGTGGGGCCATGACTCCAGGCCTCCCCAAAGCCTGGCCA	Additional Inner R primer to add Right arm of hsEmx1 HDR template
Oligos for making the Biotinylated eGFP template for tagging homo sapiens (hs) Viperin/RSAD2, hs ISG15, hs ISG56, hs ACE2 and Aedes aegypti (AeAeg) Ago3 and Piwi5
eGFP_Fw_Bio	/5Biosg/atggtgagcaagggcgagga	Fw primer to amplify and add biotin to eGFP Blasso base
eGFP_Rv_Bio	/5Biosg/CTTGTACAGCTCGTCCATGC	Rv primer to amplify and add biotin to eGFP Blasso base
Oligos for adding Homology Arms to eGFP for Viperin/RSAD2-BL3SSO construct
Rsad2_LA2	ctccccaatgacaggttgctcagagactgctgatttccatccctatataaagagagtccc	Outer F primer to add Left arm of Viperin/RSAD2 HDR template
Rsad2_LA1	ccctatataaagagagtccctggcatacagagactggctctgctccaggcatctgccacaatggtgagcaagggcgagga	Inner F primer to add Left arm of Viperin/RSAD2 HDR template
Rsad2_RA2	CTAGCAGCCAGAAGGTTGCCCTCAGCCAGCAGAACAGCGGGACCAGGCTCCTCCACAGAG	Outer R primer to add Right arm of Viperin/RSAD2 HDR template
Rsad2_RA1	GACCAGGCTCCTCCACAGAGAGCTCAGAGGTTGCCTGAACACACTCAAGAGCTTCCCAGCCTTGTACAGCTCGTCCATGC	Inner R primer to add Right arm of Viperin/RSAD2 HDR template
Oligos for genomic PCR analysis of Cas9-HDR stimulated integrants at Viperin/RSAD2 locus
Rsad2_Fw1	gatctctagtcttcagtcttg	To assess HDR and eGFP tagging of locus Viperin/RSAD2; Endogenous Viperin/RSAD2: 425bp; eGFP tagged:1115bp
Rsad2_Rv1	CTGGTTGGGGTGGTGGGCAG	To assess HDR and eGFP tagging of locus Viperin/RSAD2; Endogenous Viperin/RSAD2: 425bp; eGFP tagged:1115bp
Rsad2_NestedF1	gagtgttagtcaaagaaggtg	To assess HDR and eGFP tagging of locus Viperin/RSAD2; Endogenous Viperin/RSAD2: 302bp; eGFP tagged:992bp
Rsad2_NestedR1	CTCATCTGGCCCTCTCAGGAC	To assess HDR and eGFP tagging of locus Viperin/RSAD2; Endogenous Viperin/RSAD2: 302bp; eGFP tagged:992bp
Oligos for adding Homology Arms to eGFP for ISG15-BL3SSO construct
ISG15_LA2	gcactgtccctgggtacaggagctcgccctgcagccagtgccttgtgtgtggtgggcctg	Outer F primer to add Left arm of ISG15 HDR template
ISG15_LA1_eGFP	ccttgtgtgtggtgggcctggggctggcgccgcagtctctgaacctgtgtgacgcctgcagggctgggacATGGTGAGCAAGGGCGAGGA	Inner F primer to add Left arm of ISG15 HDR template
ISG15_RA1_eGFP	GGTGGACAGCCAGACGCTGCTGGAAGGCGTGCACGCCGATCTTCTGGGTGATCTGCGCCTTCAGCTCTGACTTGTACAGCTCGTCCATGC	Outer R primer to add Right arm of ISG15 HDR template
ISG15_RA2	CTGGCAAGGGGGACCCTGTCCTGCAGCGCCACACCGCTCGGGTGGACAGCCAGACGCTGC	Inner R primer to add Right arm of ISG15 HDR template
Oligos for genomic PCR analysis of Cas9-HDR stimulated integrants at ISG15 locus
ISG15_Fw1	ctgccggcgggatgtagaggac	Amplifies a 1023bp amplicon by F1 and R1
ISG15_Rv1	GTCGCATTTGTCCACCACCAG	Amplifies a 1023bp amplicon by F1 and R2
ISG15_Fw2	caggtcacccctgagatcctc	Amplifies a 1234bp amplicon by F2 and R2
ISG15_Rv2	GTGGGCCACGGTCTGCGTCAG	Amplifies a 1234bp amplicon by F2 and R3
Oligos for adding Homology Arms to eGFP for ISG56-BL3SSO construct
ISG56_LA2	tcctcacctaacaaagaaaatctgtttttgtttttacagtacaaatggtgatgatcatca	Outer F primer to add Left arm of ISG56 HDR template
ISG56_LA1_eGFP	acaaatggtgatgatcatcaggtcaaggatagtctggagcaattgagatgtcactttacatgggagttatATGGTGAGCAAGGGCGAGGA	Inner F primer to add Left arm of ISG56 HDR template
ISG56_RA1_eGFP	GTTTCACATAGGCTAGTAGGTTGTGTATTCCCACACTGTATTTGGTGTCTAGGAATTCAATCTGATCCAACTTGTACAGCTCGTCCATGC	Outer R primer to add Right arm of ISG56 HDR template
ISG56_RA2	TTTAAGCTCTTCAGGGCTTCCTCATTCTGGCCTTTCAGGTGTTTCACATAGGCTAGTAGG	Inner R primer to add Right arm of ISG56 HDR template
Oligos for genomic PCR analysis of Cas9-HDR stimulated integrants at ISG56 locus
ISG56_Fw1	gaaacctaagtaagttgatc	Amplifies a 1057bp amplicon by F1 and R1
ISG56_Rv1	CTTGGTTGTCATGTTCTTCCTG	Amplifies a 1057bp amplicon by F1 and R2
ISG56_Fw2	gttacttggctggaaattg	Amplifies a 1433 bp amplicon by F2 and R2
ISG56_Rv2	GAGATCGCATACCCAGCGCTG	Amplifies a 1433 bp amplicon by F2 and R2
Oligos for adding Homology Arms to eGFP for ACE2-BL3SSO construct
ACE2_LA2	ctgtgttcttcttctttttctttttttggtctttcctgctcagcgcccaacccaagttca	Outer F primer to add Left arm of ACE2 HDR template
ACE2_LA1_eGFP	cagcgcccaacccaagttcaaaggctgataagagagaaaatctcatgaggaggttttagtctagggaaagATGGTGAGCAAGGGCGAGGA	Inner F primer to add Left arm of ACE2 HDR template
ACE2_RA1_eGFP	GTTCCTCAATGGTGGACTGAGCAGCAGTTACAGCAACAAGGCTGAGAAGGAGCCAGGAAGAGCTTGACATCTTGTACAGCTCGTCCATGC	Outer R primer to add Right arm of ACE2 HDR template
ACE2_RA2	TCGGCTTCGTGGTTAAACTTGTCCAAAAATGTCTTGGCCTGTTCCTCAATGGTGGACTGA	Inner R primer to add Right arm of ACE2 HDR template
Oligos for genomic PCR analysis of Cas9-HDR stimulated integrants at ACE2 locus
ACE2_Fw1	gacaggagaggtaaggttctc	to assess bonafide HDR, transgene spanning amplicon and functional eGFP tagging at hsACE2 locus
ACE2_Rv1	CAGAGCCTCTCATTGTAGTC	to assess bonafide HDR, transgene spanning amplicon and functional eGFP tagging at hsACE2 locus
ACE2_Fw2	ctgtcctctccaggatgaac	to assess bonafide HDR, transgene spanning amplicon and functional eGFP tagging at hsACE2 locus
ACE2_Rv2	CTGCAGCTGAAGCTTGACTG	to assess bonafide HDR, transgene spanning amplicon and functional eGFP tagging at hsACE2 locus
Oligos for adding Homology Arms to eGFP for AeAeg Ago3-BL3SSO construct
AeAeg_Ago3_LA2	ttaatacaaaattctatgaaattacgtgataaaataaaacaatttccatcattctttaat	Outer F primer to add Left arm of AeAeg Ago3 HDR template
AeAeg_Ago3_eGFP_LA1	aacaatttccatcattctttaatttttattaattttaacactttgtttctttttatccccttaggagATGGTGAGCAAGGGCGAGGA	Inner F primer to add Left arm of AeAeg Ago3 HDR template
AeAeg_Ago3_eGFP_RA1	GTTCCGCGGCATCTCCGGATGAACCAGACTGACTGAGAAACGCGCGAACTAAATTCAACCGCGAGGACATCTTGTACAGCTCGTCCATGC	Outer R primer to add Right arm of AeAeg Ago3 HDR template
AeAeg_Ago3_RA2	CTTCGCTGGGGGCTTCGCCGGAAGATGGGGCCTTCGTGCGTTCCGCGGCATCTCCGGATG	Inner R primer to add Right arm of AeAeg Ago3 HDR template
Oligos for genomic PCR analysis of Cas9-HDR stimulated integrants at AeAeg Ago3 locus
AeAeg_Ago3_Fw2	cacgaaccgagtattgaggc	to assess bonafide HDR, transgene spanning amplicon and functional eGFP tagging at AeAeg Ago3 locus
AeAeg_Ago3_Rv2	CATGGCAGATCCAATACTGG	to assess bonafide HDR, transgene spanning amplicon and functional eGFP tagging at AeAeg Ago3 locus
AeAeg_Ago3_Fw3	attggattaacatagagtatgg	to assess bonafide HDR, transgene spanning amplicon and functional eGFP tagging at AeAeg Ago3 locus
AeAeg_Ago3_Rv3	TCTGCCAGCATCCGAGGTCAAC	to assess bonafide HDR, transgene spanning amplicon and functional eGFP tagging at AeAeg Ago3 locus
Oligos for adding Homology Arms to eGFP for AeAeg Piwi5-BL3SSO construct
AeAegPiwi5_LA2	tgaaatgtgtgtcaataaggctaggtaagtttttacaccccgaatggtaaacacgagcaa	Outer F primer to add Left arm of AeAeg Piwi5 HDR template
AeAeg_Piwi5_eGFP_LA1	cgaatggtaaacacgagcaaacaatccactactatacgcggtatatgcggggcaataaatttcatcaatggactacaaagaccatgacgg	Inner F primer to add Left arm of AeAeg Piwi5 HDR template
AeAeg_Piwi5_eGFP_RA1	CACCTCGACCACCGCCTCCGTGACCACGACCGCGACCTCCACGCTGTCCTCCTTGCTGTCTATCCGCCATCTTGTACAGCTCGTCCATGC	Outer R primer to add Right arm of AeAeg Piwi5 HDR template
AeAegPiwi5_RA2	CCACGATCACCACCTCCGCCACCTCGACCACCGCCTCCGCCACCTCGACCACCGCCTCCG	Inner R primer to add Right arm of AeAeg Piwi5 HDR template
Oligos for genomic PCR analysis of Cas9-HDR stimulated integrants at AeAeg Piwi5 locus
AeAeg_Piwi5_Fw3	ctagtggttacttgagccat	to assess bonafide HDR, transgene spanning amplicon and functional eGFP tagging at AeAeg Piwi5 locus
AeAeg_Piwi5_Rv3	TGCTTCTCCGCCAGTGGCAC	to assess bonafide HDR, transgene spanning amplicon and functional eGFP tagging at AeAeg Piwi5 locus
AeAeg_Piwi5_Fw4	gattacgtcggcccaccctatc	to assess bonafide HDR, transgene spanning amplicon and functional eGFP tagging at AeAeg Piwi5 locus
AeAeg_Piwi5_Rv4	GACGATATCCTGCAGCACACG	to assess bonafide HDR, transgene spanning amplicon and functional eGFP tagging at AeAeg Piwi5 locus
Oligos for adding Homology Arms to eGFP for human AGO2 BL3SSO construct
hsAgo2_ex2_LA2	gcttggggccgcgggatgggaagggccgcagagcaagcctgctcccccgttaatgggtgt	Outer F primer to add Left arm of human AGO2 HDR template
hsAgo2_ex2_LA1_eGFP	gctcccccgttaatgggtgttctctctgccattccagcacttgcacctcctgcgccgccgccccccatccATGGTGAGCAAGGGCGAGGA	Inner F primer to add Left arm of human AGO2 HDR template
hsAgo2_ex2_RA1_eGFP	AAGAAATTGGCCTGTAATTTGATTGTTCTCCCGGAGGTCCCAAAGTCGGGTCTtGGaGGtGGCTTGAAGGCTTGTACAGCTCGTCCATGC	Outer R primer to add Right arm of human AGO2 HDR template
hsAgo2_ex2_RA2	TTCATAATGATAGATGTCAATTTTGGGGATGTCCATTTCGAAGAAATTGGCCTGTAATTT	Inner R primer to add Right arm of human AGO2 HDR template
Oligos for genomic PCR analysis of Cas9-HDR stimulated integrants at human AGO2 locus
hsAgo2_ex2_short_Fw1	gacgttgagacgcctcctctg	to assess bonafide HDR, transgene spanning amplicon and functional eGFP tagging at human AGO2 locus
hsAgo2_ex2_short_Rv1	CAGTTGTGCATTTACGATG	to assess bonafide HDR, transgene spanning amplicon and functional eGFP tagging at human AGO2 locus
hsAgo2_ex2_short_Fw2	ctggacgtgaatggaaacag	to assess bonafide HDR, transgene spanning amplicon and functional eGFP tagging at human AGO2 locus
hsAgo2_ex2short_Rv2	GTAATACCTGTTAACTCTCCTC	to assess bonafide HDR, transgene spanning amplicon and functional eGFP tagging at human AGO2 locus
